# Supplementary material
Source: PubMed Central journal article supplement (PMC9760326)
Supplement: mmc1.pdf [file mmc1.pdf]

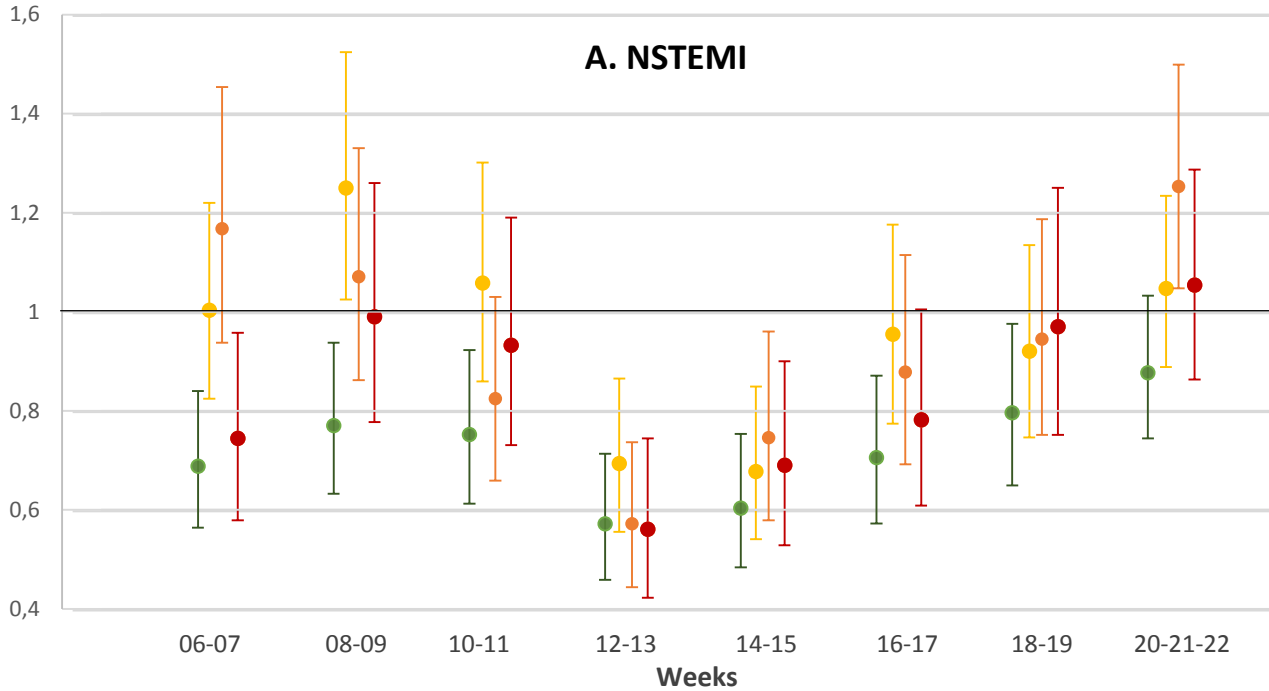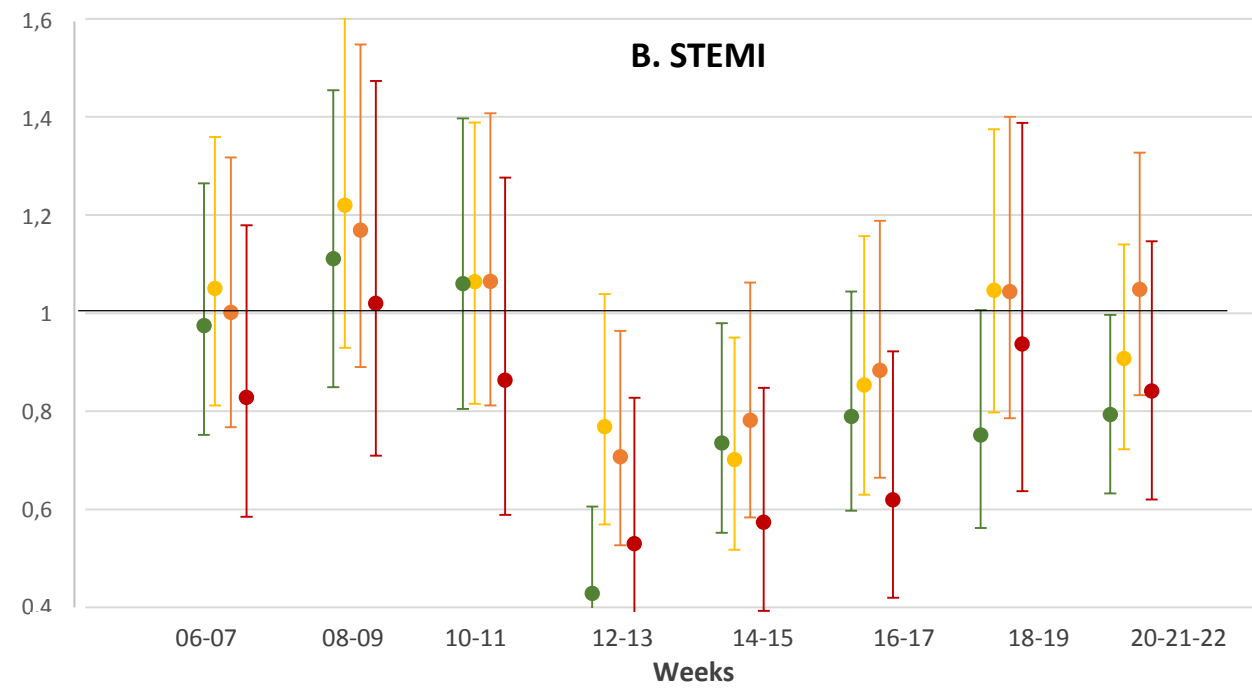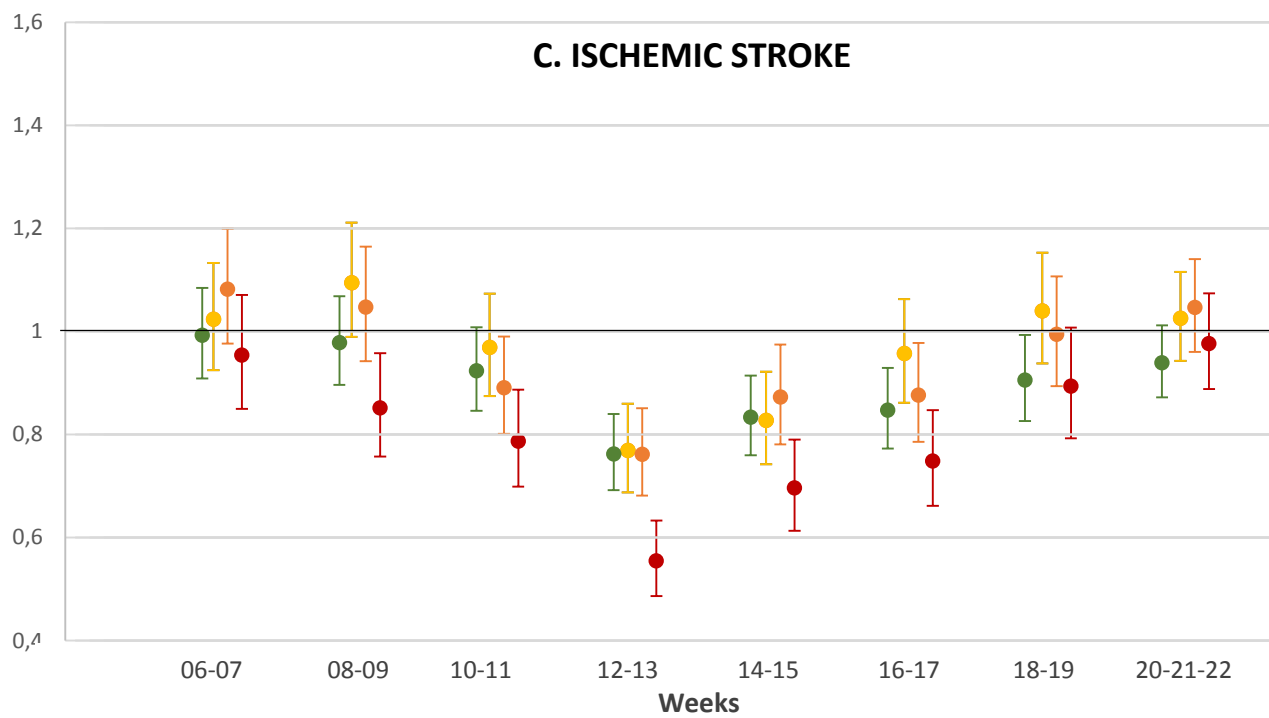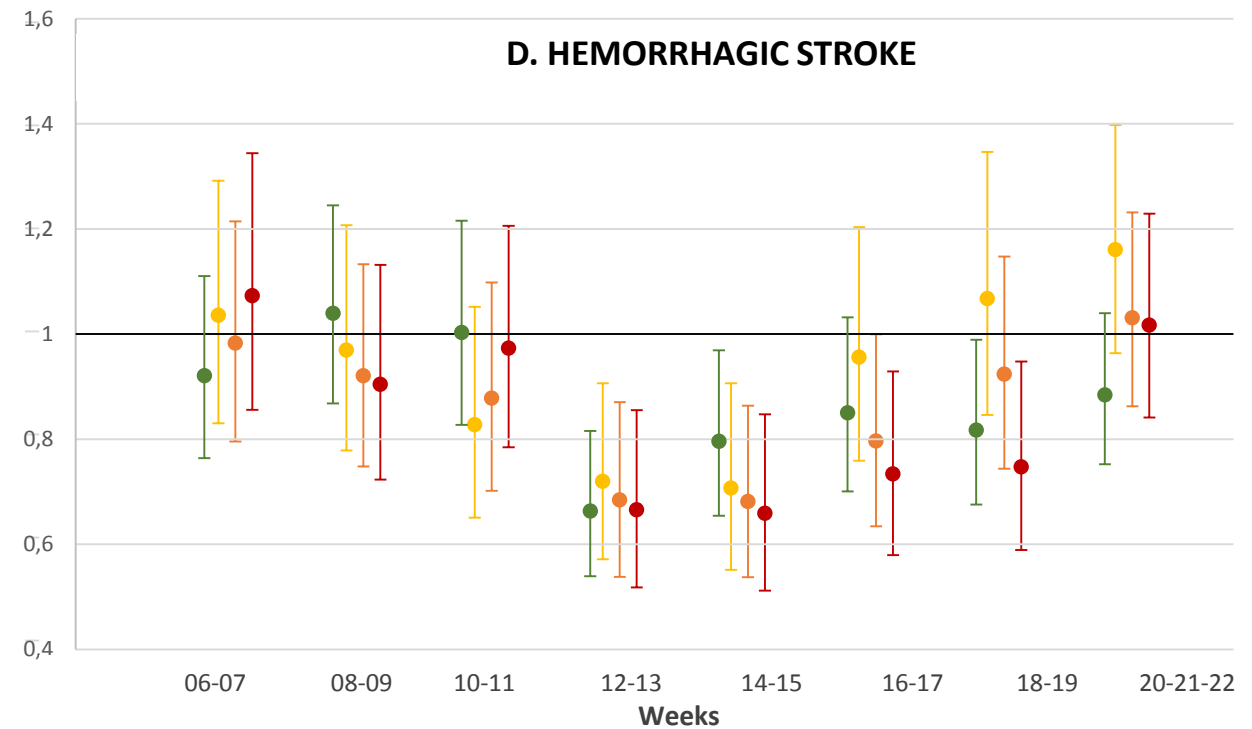

### A. NSTEMI

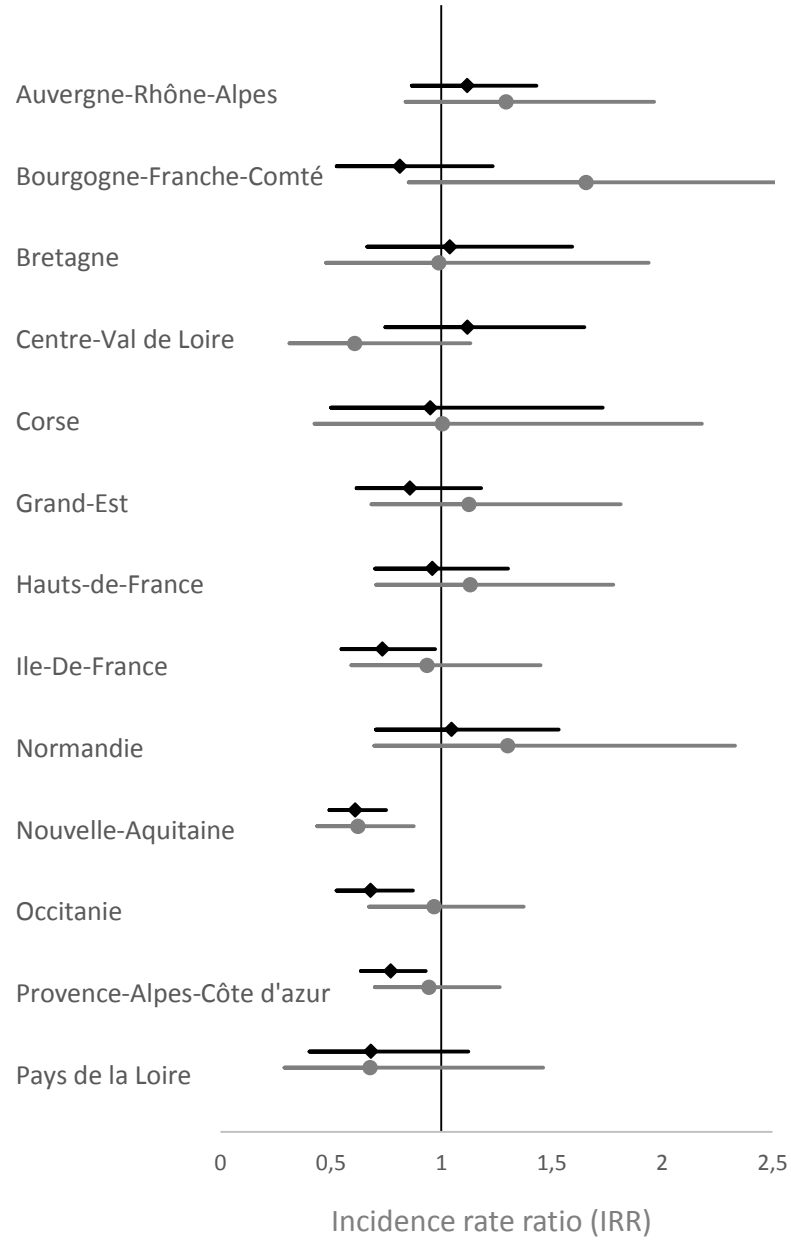

### B. STEMI

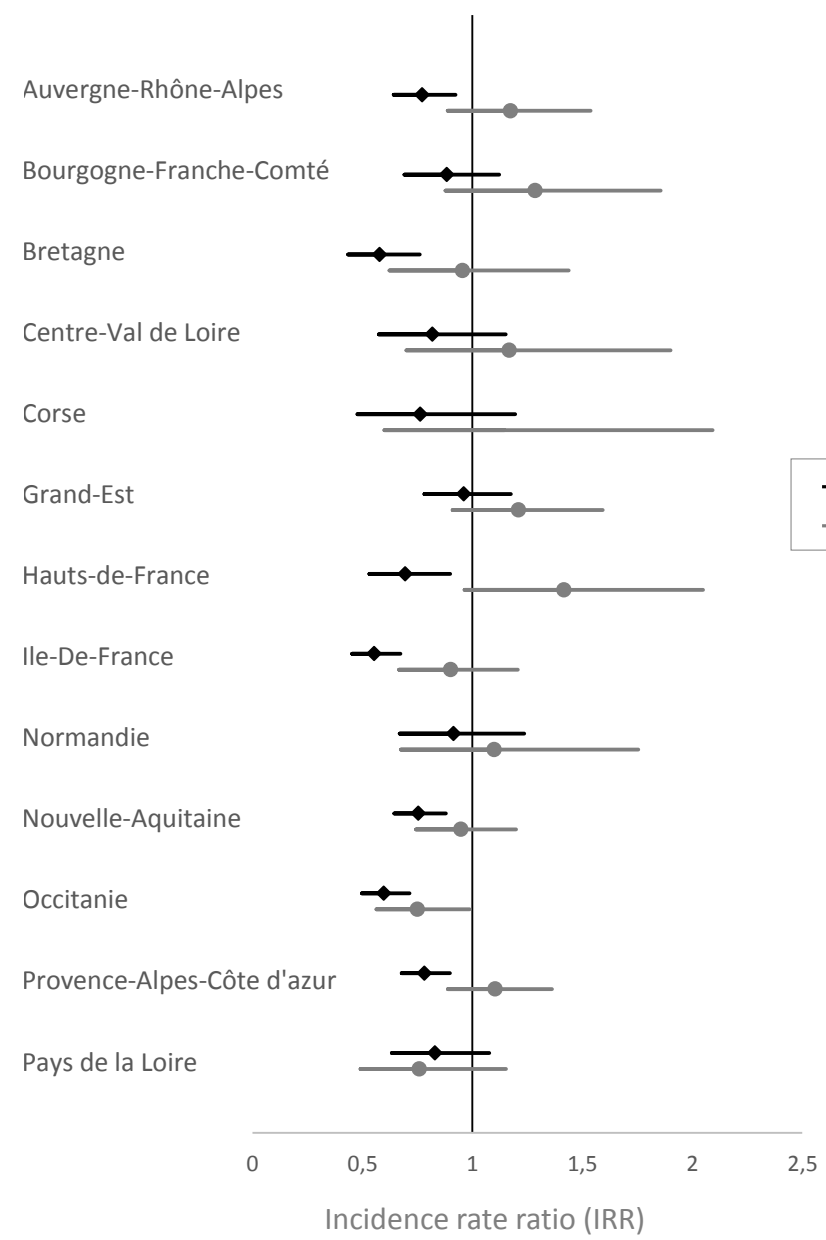

— During the lockdown  
— After the lockdown

### C. ISCHEMIC STROKE

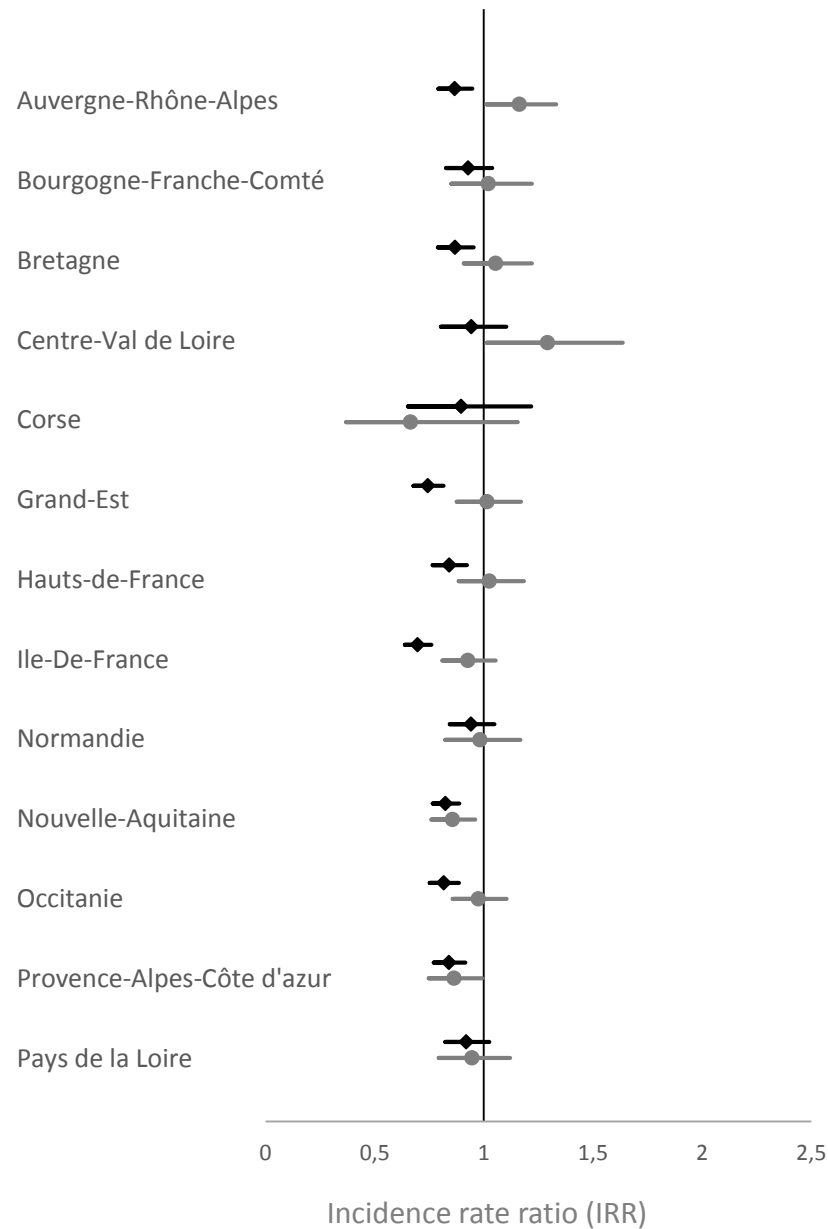

### D. HEMORRHAGIC STROKE

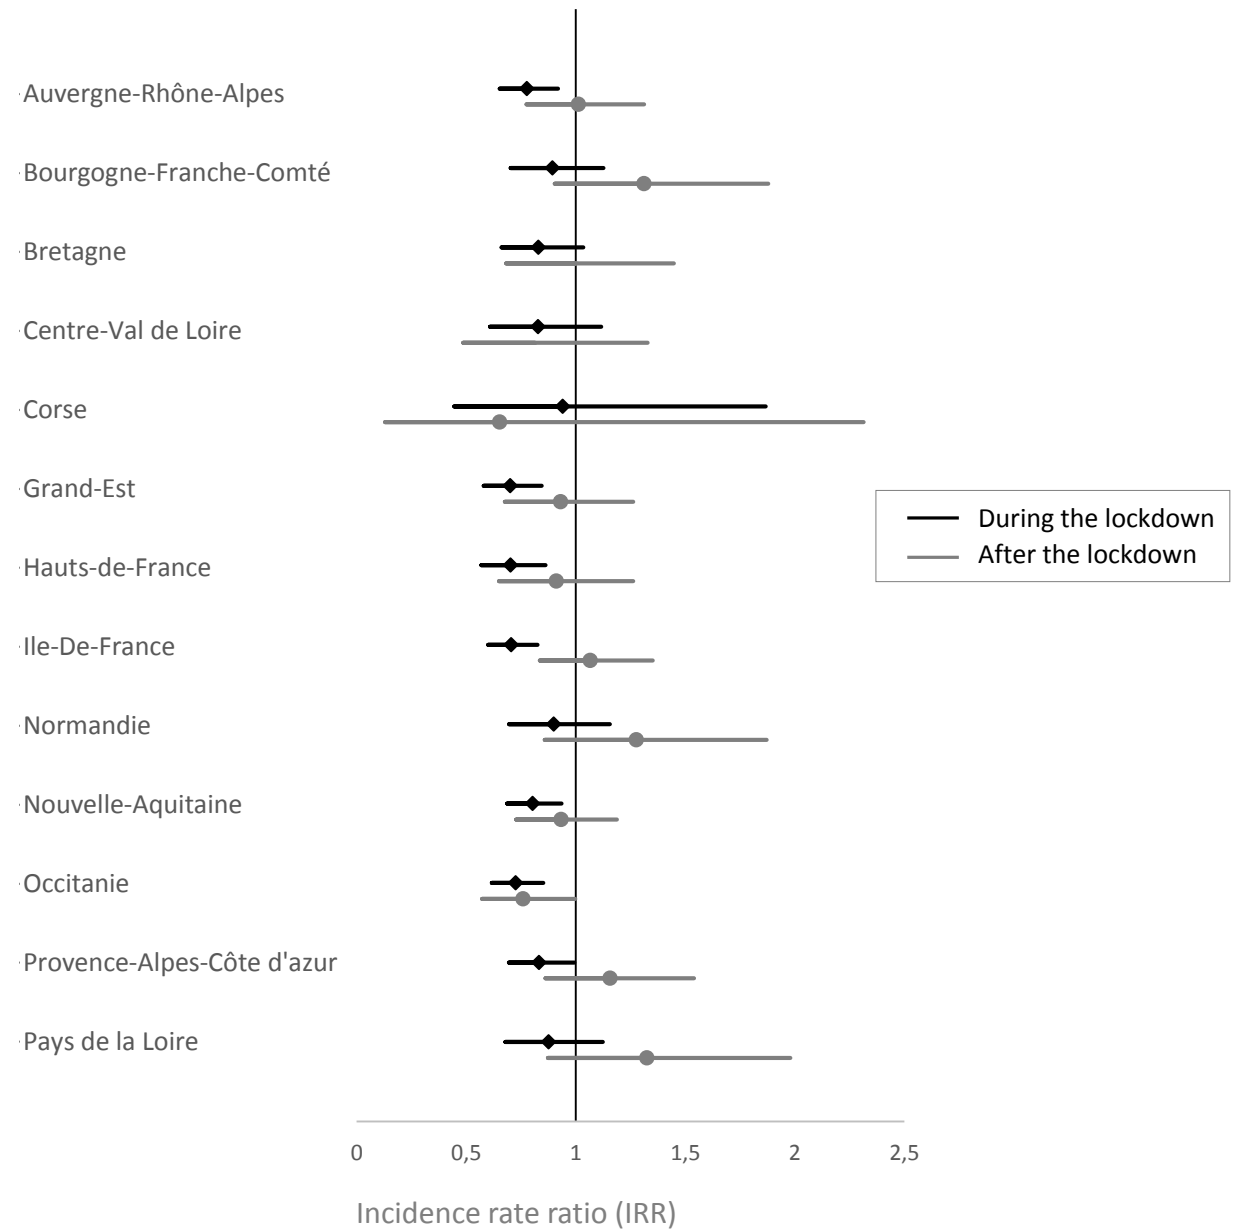

— During the lockdown  
— After the lockdown
